# Supplementary material for: Effects of electromagnetic waves on oocyte maturation and embryonic development in pigs
Source: PubMed Central journal article supplement — J Reprod Dev. 2021 Oct 23;67(6):392–401. doi: 10.1262/jrd.2021-074 (PMC8668371; doi:10.1262/jrd.2021-074), 2021-10-23
Supplement: jrd-67-392-s001.pdf [file jrd-67-392-s001.pdf]

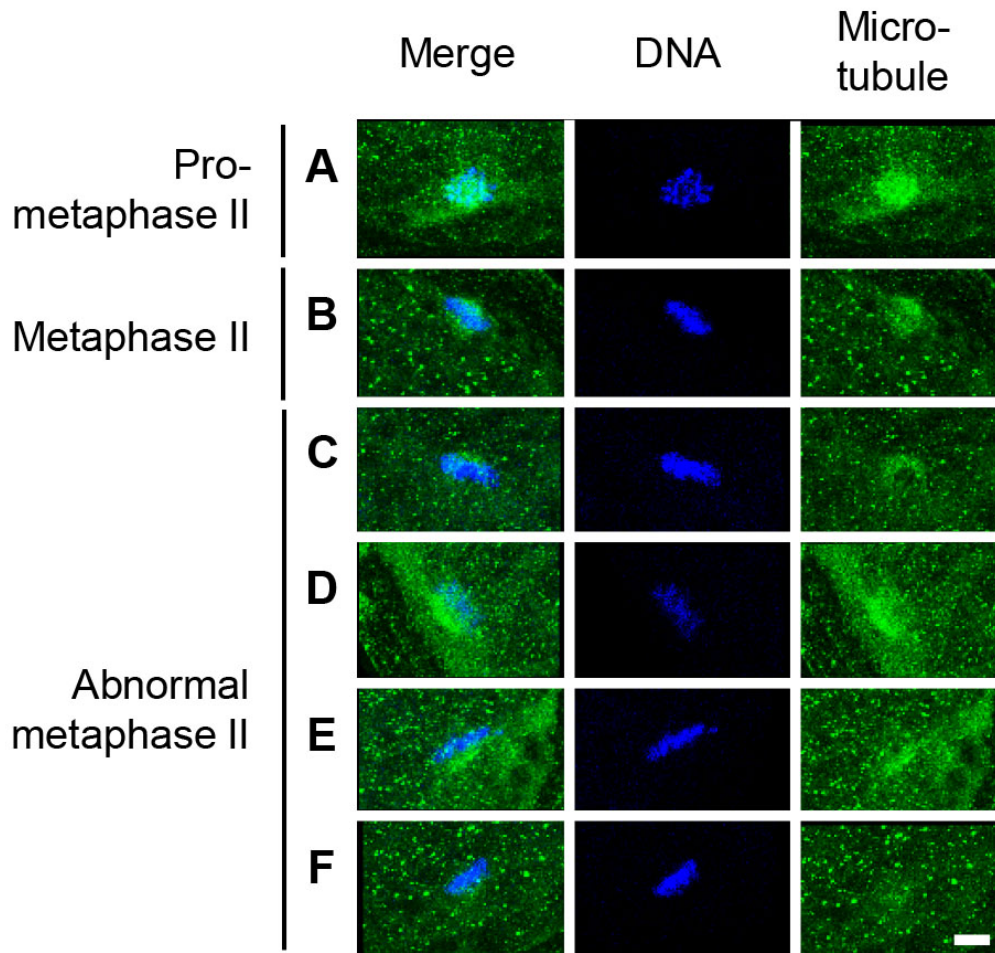

**Supplementary Fig. 1.** Morphology of the microtubules and the metaphase plate of oocytes during 44 h IVM. **(A)** The microtubules surrounding the chromosomes can be observed in the pro-metaphase II oocytes. **(B)** Chromosomes align on the metaphase plate and the microtubules form spindles in the mature (MII) oocytes. **(C–F)** Abnormal microtubular distribution in the MII oocytes. Blue: chromosomes; green: microtubules. Scale bar: 10  $\mu$ m.

**Supplementary Table 1. The proportion of maturing and matured oocytes after 44 h of IVM culture.**

| <b>EMF, G</b>              | <b>0</b> | <b>(%)</b> | <b>25</b> | <b>(%)</b> | <b>50</b> | <b>(%)</b> | <b>75</b> | <b>(%)</b> | <b>100</b> | <b>(%)</b> |
|----------------------------|----------|------------|-----------|------------|-----------|------------|-----------|------------|------------|------------|
| <b>PMII</b>                | 13       | (48.15)    | 17        | (60.72)    | 16        | (53.33)    | 21        | (67.74)    | 13         | (48.14)    |
| <b>MII</b>                 | 11       | (40.74)    | 8         | (28.57)    | 6         | (20.00)    | 3         | (9.68)     | 7          | (25.93)    |
| <b>Abnormality</b>         | 4        | (14.81)    | 3         | (10.71)    | 8         | (26.67)    | 7         | (22.58)    | 7          | (25.93)    |
| <b>Total oocyte number</b> | 27       |            | 28        |            | 30        |            | 31        |            | 27         |            |

G: Gauss

PMII: pro-metaphase II

MII: metaphase II
